# Supplementary material
Source: PubMed Central journal article supplement (PMC4253502)
Supplement: imm0143-0539-sd1.pdf [file imm0143-0539-sd1.pdf]

# Supplementary figure 1

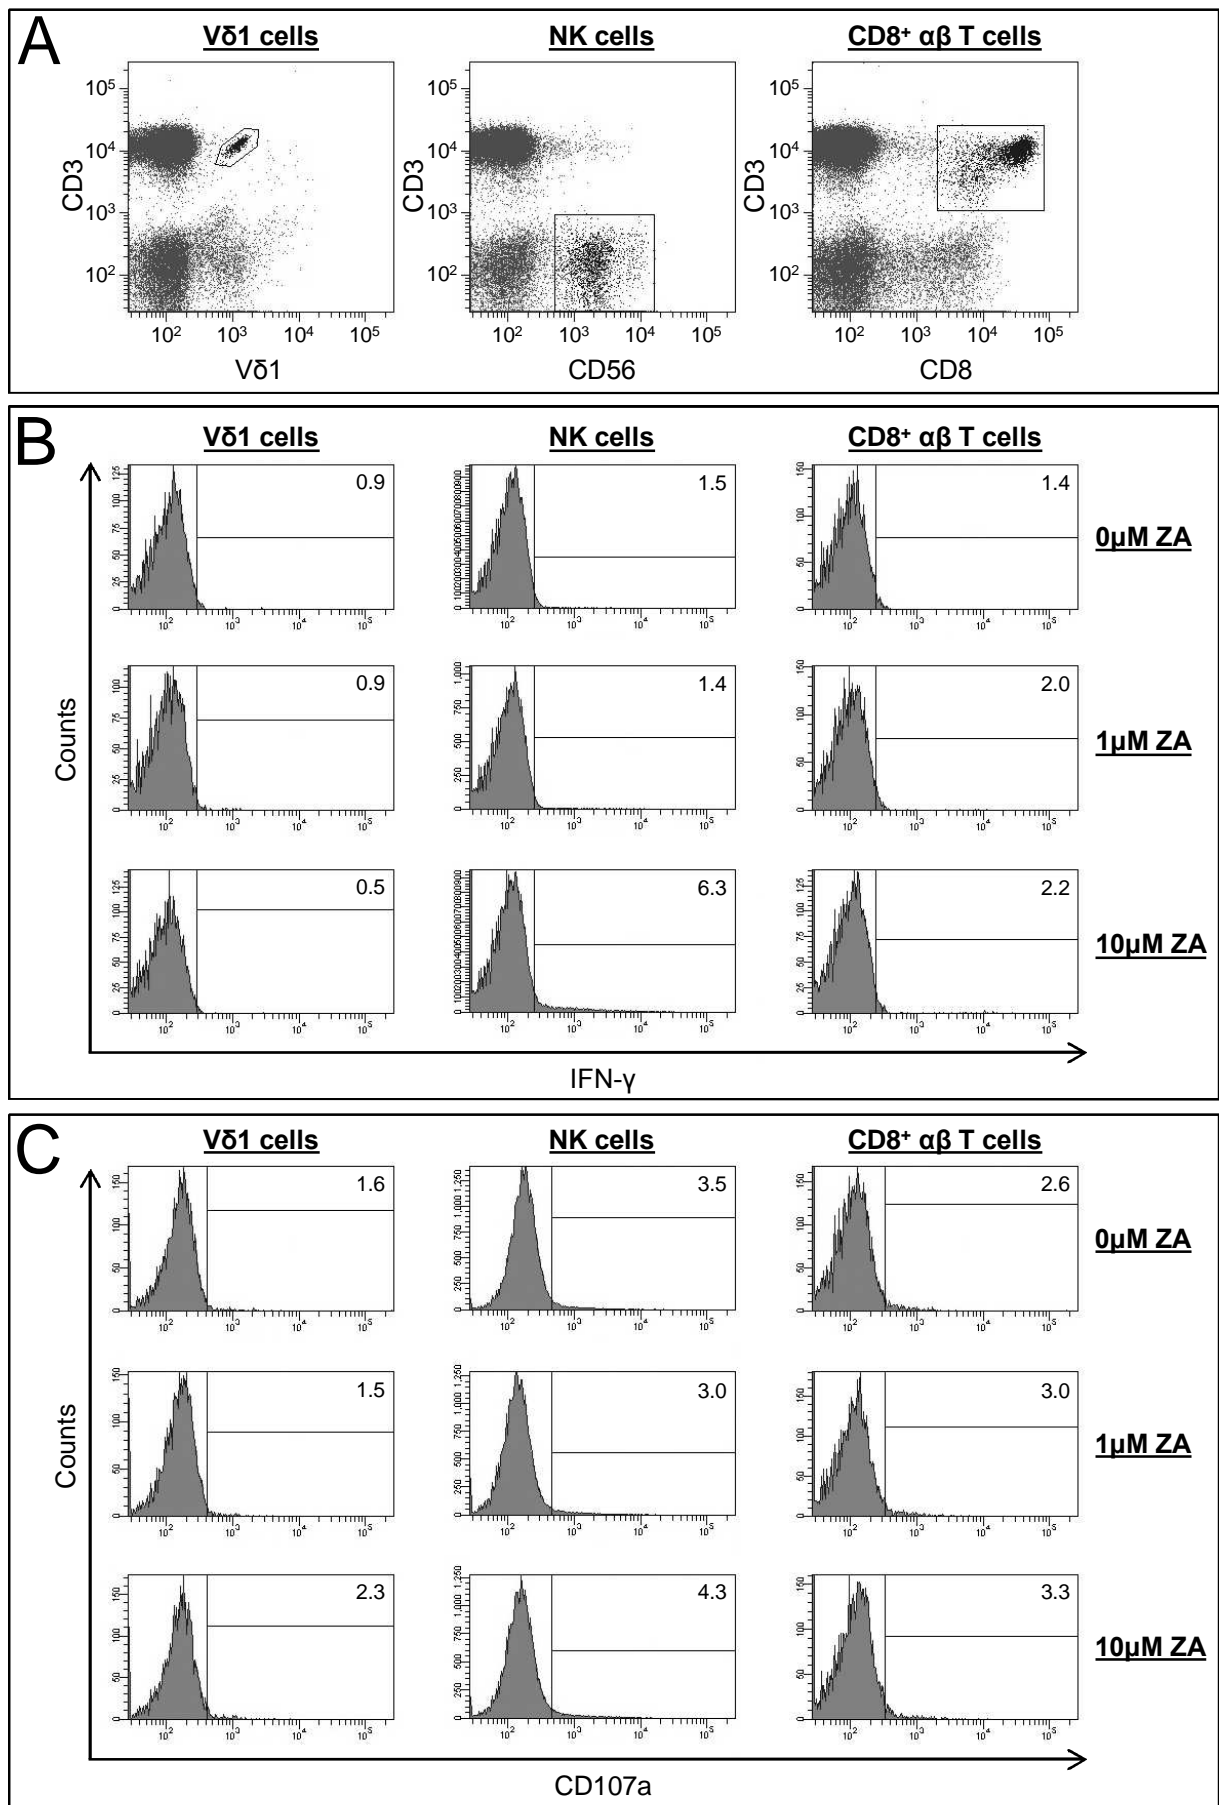

**Supplementary figure 1: V $\delta$ 1 cells, NK cells and CD8<sup>+</sup>  $\alpha$  $\beta$  T cells within ZA-treated PBMCs do not degranulate.** PBMCs were cultured overnight with 0, 1 or 10 $\mu$ M ZA prior to flow cytometric analysis of CD3, V $\delta$ 1, CD56, CD8, IFN- $\gamma$ , and CD107a expression. A) Representative flow cytometric plots depicting the gating strategy. Lymphocytes were gated according to FSC and SSC, and V $\delta$ 1 cells (V $\delta$ 1<sup>+</sup>CD3<sup>+</sup>), NK cells (CD56<sup>+</sup>CD3<sup>-</sup>) and CD8<sup>+</sup>  $\alpha$  $\beta$  T cells (CD8<sup>+</sup>CD3<sup>+</sup>) gated as shown. B) Representative flow cytometric plots showing IFN- $\gamma$  expression within gated V $\delta$ 1 cells, NK cells and CD8<sup>+</sup>  $\alpha$  $\beta$  T cells. Numbers on flow cytometric plots are percentages of cells within the marker. C) Representative flow cytometric plots showing CD107a expression within gated V $\delta$ 1 cells, NK cells and CD8<sup>+</sup>  $\alpha$  $\beta$  T cells. Numbers on flow cytometric plots are percentages of cells within the marker. For (A), (B) and (C), data is representative of three different donors; however, measurable numbers of V $\delta$ 1 cells were only detected in one of the three donors.
