# Supplementary material
Source: PubMed Central journal article supplement (PMC4253502)
Supplement: imm0143-0539-sd2.pdf [file imm0143-0539-sd2.pdf]

## Supplementary figure 2

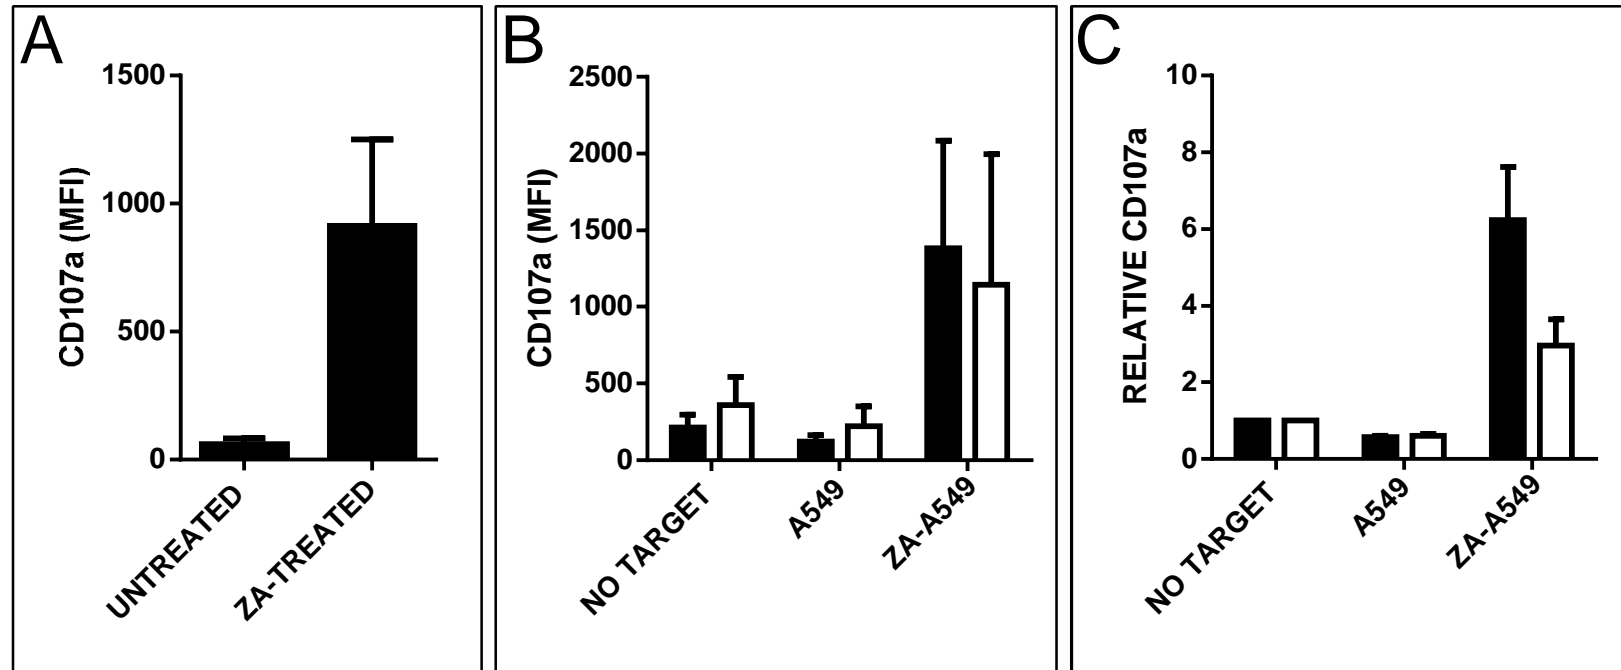

**Supplementary figure 2:  $\gamma\delta$  T cells isolated from ZA-treated PBMCs degranulate following subsequent co-culture with ZA-treated A549 cells.** A) PBMCs were cultured overnight with or without  $1\mu\text{M}$  ZA prior to flow cytometric analysis of CD107a on gated V $\delta$ 2 cells. Means $\pm$ SD for three different donors are shown. B)  $\gamma\delta$  T cells were isolated from the PBMCs in (A) and rested overnight prior to co-culturing with or without A549 cells that had been pre-treated overnight with or without  $1\mu\text{M}$  ZA. Flow cytometric analysis of CD107a on gated V $\delta$ 2 cells was then carried out. Means $\pm$ SD for three different donors are shown. C) Data in (B) was standardised by expressing scores relative to “no target” controls. For (B) and (C), black bars and white bars represent  $\gamma\delta$  T cells isolated from untreated and ZA-treated PBMCs, respectively.
